# Supplementary material for: Effectiveness of Live Attenuated Varicella-Zoster Vaccine in Adults Older than 50 Years in Japan: A Retrospective Cohort Study
Source: MDPI journal article supplement (doi:10.3390/vaccines11020259), 2023-01-25
Supplement: s1 [file s1]

**Table S1.** Information from medical institutions.

| Outcome             | Vaccinated Group ( <i>n</i> = 16) | Unvaccinated Group ( <i>n</i> = 10) | <i>p</i> - value <sup>a</sup> |
|---------------------|-----------------------------------|-------------------------------------|-------------------------------|
| HZ diagnosis        | 13 (81)                           | 9 (90)                              | 1.0                           |
| Rapid examination   | 16 (100)                          | 10 (100)                            | 0.38                          |
| Sequala             | 2 (13)                            | 4 (40)                              | 0.16                          |
| Antiviral treatment | 12 (75)                           | 8 (80)                              | 1.0                           |
| Analgesia           | 9 (56)                            | 8 (80)                              | 0.40                          |

<sup>a</sup> Chi-square test or Fisher's exact test were used as appropriate; HZ: Herpes zoster

**Table S2.** The severity and duration of pain in both groups.

| Severity/Duration            | HZ Patients in Vaccinated Group ( <i>n</i> = 26) | HZ Patients in Unvaccinated Group ( <i>n</i> = 22) | <i>p</i> - value <sup>a</sup> |
|------------------------------|--------------------------------------------------|----------------------------------------------------|-------------------------------|
| Mild                         | 3 (11)                                           | 7 (32)                                             | 0.97                          |
| Moderate                     | 16 (61)                                          | 11 (50)                                            |                               |
| Severe                       | 7 (27)                                           | 4 (18)                                             |                               |
| Short (less than 2 weeks)    | 16 (61)                                          | 16 (73)                                            | 0.73                          |
| Moderate (2 weeks ~ a month) | 8 (31)                                           | 5 (23)                                             |                               |
| Long (more than a month)     | 2 (8)                                            | 1 (4)                                              |                               |

<sup>a</sup> Chi-square test or Fisher's exact test were used as appropriate.
